# Supplementary material
Source: MDPI journal article supplement (https://www.mdpi.com/2073-4395/13/2/447)
Supplement: s1 [file s1]

## SUPPLEMENTAL MATERIAL

**Table S1.** List of the EU project aiming to improve perennial biomass crops cultivation on marginal lands.

| Project name  | Title                                                                                                   | Funding scheme        | Year      | Crops                                                                        | Reference                                                                                                   |
|---------------|---------------------------------------------------------------------------------------------------------|-----------------------|-----------|------------------------------------------------------------------------------|-------------------------------------------------------------------------------------------------------------|
| WATBIO        | Development of improved perennial non-food biomass and bioproduct crops for water stressed environments | EU FP7                | 2012-2017 | Poplar, Miscanthus, Giant reed                                               | <a href="https://cordis.europa.eu/project/id/311929/it">https://cordis.europa.eu/project/id/311929/it</a>   |
| OPTIMA        | Optimization of Perennial Grasses for Biomass Production                                                | EU FP7                | 2011-2015 | Miscanthus, Switchgrass, Giant reed                                          | [76]                                                                                                        |
| OPTIMISC      | Optimizing Miscanthus Biomass Production                                                                | EU FP7                | 2011-2015 | Miscanthus                                                                   | [8]                                                                                                         |
| GIANT         | Genetic improvement of Miscanthus to be a sustainable feedstock for bioenergy in the UK                 | DEFRA, BBSRC          | 2011-2016 | Miscanthus                                                                   | <a href="http://www.miscanthusbreeding.org/results.html">http://www.miscanthusbreeding.org/results.html</a> |
| GRASS MARGINS | Enhancing biomass production from marginal lands with perennial grasses                                 | EU FP7                | 2011-2015 | Miscanthus, C3 grasses                                                       | <a href="https://cordis.europa.eu/project/id/289461">https://cordis.europa.eu/project/id/289461</a>         |
| MISCOMAR      | Miscanthus biomass options for contaminated and marginal land: quality, quantity and soil interactions  | FACCE SURPLUS ERA-NET | 2016-2019 | Miscanthus                                                                   | <a href="http://www.miscomar.ietu.pl">http://www.miscomar.ietu.pl</a> ),                                    |
| GRACE         | Growing Advance industrial Crops for bioRefineries                                                      | BBI JU Horizon 2020   | 2017-2022 | Miscanthus, Hemp                                                             | <a href="https://www.grace-bbi.eu">https://www.grace-bbi.eu</a>                                             |
| MAGIC         | Marginal lands for Growing Industrial Crops                                                             | Horizon 2020          | 2017-2021 | Black locust, Poplar, Willow, Miscanthus, Switchgrass, Giant reed and others | <a href="https://magic-h2020.eu">https://magic-h2020.eu</a> [77,78]                                         |
| PANACEA       | Non-Food Crops for a EU bioeconomy                                                                      | Horizon 2020          | 2017-2020 | Miscanthus, Switchgrass, Giant reed                                          | <a href="http://www.panacea-h2020.eu">http://www.panacea-h2020.eu</a>                                       |
| FORBIO        | Fostering sustainable feedstock production for advanced biofuels on underutilized land in Europe        | Horizon 2020          | 2015-2018 | Black locust                                                                 | <a href="http://www.forbio-project.eu">www.forbio-project.eu</a>                                            |
| SEEMLA        | Sustainable exploitation of biomass for bioenergy from marginal lands                                   | Horizon 2020          | 2016-2018 | Black locust                                                                 | <a href="http://www.seemla.eu/en/home/">http://www.seemla.eu/en/home/</a>                                   |

**Table S2.** C source and formulas to estimate the C input from plants (Mg C ha<sup>-1</sup>) as adapted from Farina et al. [30]

| Type of crop                                                                                 | Source of C                   | Formulas                                    | Crop         | Parameters value |      |      | Reference |      |
|----------------------------------------------------------------------------------------------|-------------------------------|---------------------------------------------|--------------|------------------|------|------|-----------|------|
|                                                                                              |                               |                                             |              | HI               | R:S  | Turn | R:S       | Turn |
| Perennial biomass crops                                                                      | C from stubble and chaff (Cs) | $0.1 \times (Y/HI) \times 0.45$             | Black locust | 0.9              | 0.5  | 1.00 | [79]      | [79] |
|                                                                                              | C in roots (Cr)               | $(Y/HI) \times R:S \times Turn \times 0.45$ | Poplar       | 0.9              | 0.2  | 0.84 | [80]      | [81] |
|                                                                                              | C in roots exudates (Ce)      | $0.09 \times (Y/HI) \times 0.45$            | Willow       | 0.9              | 0.2  | 0.80 | [82]      | [83] |
|                                                                                              | Ctot                          | $C_s + C_r + C_e$                           | Miscanthus   | 0.9              | 0.33 | 0.50 | [84]      | [85] |
|                                                                                              |                               |                                             | Switchgrass  | 0.9              | 2.5  | 0.50 | [86]      | [85] |
|                                                                                              |                               |                                             | Giant reed   | 0.9              | 0.2  | 0.50 | [84]      | [85] |
| Annual crops                                                                                 | C from stubble and chaff (Cs) | $0.1 \times (Y/HI) \times 0.45$             | Sorghum      | 0.9              | 0.20 | /    | [87]      | /    |
|                                                                                              | C in roots (Cr)               | $(Y/HI) \times (R:S) \times 0.45$           | Soybean      | 0.50             | 0.3  | /    | [88]      | /    |
|                                                                                              | C in roots exudates (Ce)      | $0.09 \times (Y/HI) \times 0.45$            | Wheat        | 0.45             | 0.15 | /    | [89]      | /    |
|                                                                                              | C in weeds (Cw)               | $0.07 \times (Y/HI) \times 0.45$            |              |                  |      |      |           |      |
|                                                                                              | Ctot                          | $C_s + C_r + C_e + C_w$                     |              |                  |      |      |           |      |
| Note: Y: Yield of the crop; HI: Harvest Index; R:S: Root to Shoot ratio, Turn: Turnover rate |                               |                                             |              |                  |      |      |           |      |

**Table S3.** Parameters used to describe the belowground biomass of the perennial biomass crops in ECOSSE.

| Crop         | Dry matter in fresh biomass (%) | N in dry matter (%) | C in dry matter (%) | N that is NH <sub>4</sub> <sup>+</sup> | Percent of biomass that is lost as gas (%) | Critical level of rainfall below which volatilisation occurs (mm) | N in biomass that is decomposed organic matter (%) -i.e Organic N | Percent of biomass added in top 25 cm (%) | Liquid? (0=no; 1=yes) |
|--------------|---------------------------------|---------------------|---------------------|----------------------------------------|--------------------------------------------|-------------------------------------------------------------------|-------------------------------------------------------------------|-------------------------------------------|-----------------------|
| Poplar       | 45                              | 0.9                 | 39.2                | 0.01                                   | 0.1                                        | 5                                                                 | 99                                                                | 100                                       | 0                     |
| Willow       | 48                              | 0.7                 | 37.8                | 0.01                                   | 0.1                                        | 5                                                                 | 99                                                                | 100                                       | 0                     |
| Black locust | 50                              | 2.0                 | 35.7                | 0.01                                   | 0.1                                        | 5                                                                 | 99                                                                | 100                                       | 0                     |
| Switchgrass  | 45                              | 0.8                 | 38.0                | 0.01                                   | 0.1                                        | 5                                                                 | 99                                                                | 100                                       | 0                     |
| Giant reed   | 45                              | 0.8                 | 38.3                | 0.01                                   | 0.1                                        | 5                                                                 | 99                                                                | 100                                       | 0                     |
| Miscanthus   | 45                              | 0.9                 | 38.5                | 0.01                                   | 0.1                                        | 5                                                                 | 99                                                                | 100                                       | 0                     |

**Table S4.** Annual biomass production (Mg DM ha<sup>-1</sup>) of six different perennial biomass crops in the experimental trial of Gariga.

Values from year 2007 to 2014 are taken from Amaducci et al. [3]. Data from 2015 to 2017 are unpublished data. Herbaceous perennial crops were harvested every year, while woody perennial crops were harvested every 2 or 3 years.

| Perennial Biomass Crops                                                                                                                                                           |              | Biomass production (Mg DM ha <sup>-1</sup> ) |       |      |       |      |      |       |      |      |       |      |
|-----------------------------------------------------------------------------------------------------------------------------------------------------------------------------------|--------------|----------------------------------------------|-------|------|-------|------|------|-------|------|------|-------|------|
|                                                                                                                                                                                   |              | 2007                                         | 2008* | 2009 | 2010* | 2011 | 2012 | 2013* | 2014 | 2015 | 2016* | 2017 |
| Woody PBCs                                                                                                                                                                        | Black locust | 3.6                                          | 3.6   | 9.2  | 9.2   | 10.8 | 10.8 | 10.8  | 17.7 | 17.7 | 17.7  | 10.1 |
|                                                                                                                                                                                   | Poplar       | 3.5                                          | 3.5   | 15.1 | 15.1  | 12.3 | 12.3 | 12.3  | 15.7 | 15.7 | 15.7  | 11.0 |
|                                                                                                                                                                                   | Willow       | 2.7                                          | 2.7   | 14.4 | 14.4  | 13.4 | 13.4 | 13.4  | 11.3 | 11.3 | 11.3  | 11.0 |
| Herbaceous PBCs                                                                                                                                                                   | Miscanthus   | < 1                                          | 7.00  | 14.0 | 17.5  | 16.9 | 12.8 | 19.4  | 15.3 | 15.4 | 14.5  | 18.0 |
|                                                                                                                                                                                   | Switchgrass  | 1.9                                          | 12.1  | 15.4 | 14.4  | 14.8 | 11.4 | 14.7  | 14.4 | 9.0  | 12.8  | 19.4 |
|                                                                                                                                                                                   | Giant reed   | 3.29                                         | 14.9  | 20.1 | 24.0  | 21.2 | 13.7 | 21.5  | 15.3 | 13.4 | 17.6  | 19.9 |
| Note: years with * represent the years in which woody crop biomass was harvested. Total biomass production was divided according to the number of years from the previous harvest |              |                                              |       |      |       |      |      |       |      |      |       |      |

**Table S5.** Biomass production (Mg DM ha<sup>-1</sup>) and C inputs (Mg C ha<sup>-1</sup>) of annual crops cultivated in the experimental trial of Gariga, after the reversion of six perennial biomass crops. Different letters within the same column indicate significant differences ( $p < 0.05$ ) among crops, according to Tukey's test.

| PEC                                        |              | Biomass production (Mg DM ha <sup>-1</sup> ) |         |     |        |     |         |      |       | C input for ECOSSE model |      |         |        |         |
|--------------------------------------------|--------------|----------------------------------------------|---------|-----|--------|-----|---------|------|-------|--------------------------|------|---------|--------|---------|
|                                            |              | PBC average                                  | Sorghum |     | Fallow |     | Soybean |      | Wheat |                          | PECs | Sorghum | Fallow | Soybean |
| Woody<br>PBCs                              | Black locust | 10.10                                        | 15.1    | d   | 5.3    | b   | 6.3     | 10.4 | b     | 2.2                      | 3.4  | 3.0     | 1.6    | 1.9     |
|                                            | Poplar       | 11.00                                        | 13.4    | cd  | 3.7    | b   | 6.5     | 8.1  | ab    | 0.7                      | 3.0  | 2.1     | 1.6    | 1.5     |
|                                            | Willow       | 11.00                                        | 10.7    | b   | 4.5    | b   | 6.6     | 7.7  | a     | 0.7                      | 2.4  | 2.5     | 1.6    | 1.4     |
| Herbaceous<br>PBCs                         | Miscanthus   | 13.89                                        | 4.6     | a   | 0.9    | a   | 5.6     | 7.0  | a     | 1.2                      | 1.0  | 0.5     | 1.4    | 1.3     |
|                                            | Switchgrass  | 11.49                                        | 7.8     | a   | 0.4    | a   | 6.0     | 8.0  | ab    | 6.3                      | 1.8  | 0.2     | 1.4    | 1.5     |
|                                            | Giant reed   | 16.82                                        | 11.4    | bc  | 1.8    | a   | 5.6     | 7.4  | a     | 1.1                      | 2.6  | 1.0     | 1.4    | 1.4     |
| Anova<br>Table                             | Factor       |                                              | F       | P   | F      | P   | F       | P    | F     | P                        |      |         |        |         |
|                                            | CROP         |                                              | 29.26   | *** | 21.03  | *** | 0.58    | ns   | 5.12  | **                       |      |         |        |         |
| Sign: *** = < 0.001, ** = <0.01, * =< 0.05 |              |                                              |         |     |        |     |         |      |       |                          |      |         |        |         |

**Table S6.** Soil organic carbon stock (Mg C ha<sup>-1</sup>) in the first 30 cm of the soil before and after the reversion of six different perennial biomass crops in Gariga. Different letters within the same column indicate significant differences ( $p < 0.05$ ) among crops, according to Tukey's test. Different letters in the timeline indicate differences ( $P < 0.05$ ) between sampling time according to Tukey's test.

| CROP               |              | 11 <sup>th</sup> year a | Reversion b | Sorghum ab | Fallow c | Soybean c | Wheat c | Factor      | F     | P     |
|--------------------|--------------|-------------------------|-------------|------------|----------|-----------|---------|-------------|-------|-------|
| Woody<br>PBCs      | Black locust | 39.04 a                 | 40.84 b     | 41.91 ab   | 49.95 bc | 48.11 b   | 47.87 a | CROP        | 4.16  | 0.002 |
|                    | Poplar       | 35.74 a                 | 40.77 ab    | 40.13 ab   | 46.19 ab | 48.66 b   | 45.73 a | TIME        | 86.49 | 0.001 |
|                    | Willow       | 38.19 a                 | 39.73 ab    | 40.48 b    | 48.36 ab | 49.71 b   | 48.28 a | CROP x TIME | 2.78  | 0.001 |
| Herbaceous<br>PBCs | Miscanthus   | 37.85 a                 | 42.75 b     | 39.90 ab   | 44.62 a  | 47.31 ab  | 46.82 a |             |       |       |
|                    | Switchgrass  | 35.62 a                 | 41.99 ab    | 38.99 ab   | 46.99 ab | 42.96 a   | 45.33 a |             |       |       |
|                    | Giant reed   | 38.76 a                 | 37.11 a     | 35.47 a    | 52.26 c  | 45.71 ab  | 45.62 a |             |       |       |

**Table S7.** Soil organic carbon stock (Mg C ha<sup>-1</sup>) based on an equivalent soil mass procedure (4000 Mg ha<sup>-1</sup> of soil) before and after the reversion of six different perennial biomass crops in Gariga. Different letters within the same column indicate significant differences ( $p < 0.05$ ) among crops, according to Tukey's test. Different letters in the timeline indicate differences ( $P < 0.05$ ) between sampling time according to Tukey's test.

| CROP               |              | 11 <sup>th</sup> year a | Reversion bc | Sorghum b | Fallow c | Soybean c | Wheat bc | Factor         | F     | P     |
|--------------------|--------------|-------------------------|--------------|-----------|----------|-----------|----------|----------------|-------|-------|
| Woody<br>PBCs      | Black locust | 38.00 a                 | 47.35 a      | 44.19 a   | 49.67 a  | 45.30 a   | 45.51 a  | CROP           | 3.86  | 0.003 |
|                    | Poplar       | 35.26 a                 | 44.21 a      | 41.73 a   | 51.45 a  | 46.15 a   | 45.42 a  | TIME           | 64.31 | 0.001 |
|                    | Willow       | 37.70 a                 | 48.37 a      | 47.39 a   | 47.06 a  | 49.50 ab  | 49.42 a  | CROP x<br>TIME | 1.53  | ns    |
| Herbaceous<br>PBCs | Miscanthus   | 36.14 a                 | 47.72 a      | 45.87 a   | 48.83 a  | 47.26 ab  | 46.06 a  |                |       |       |
|                    | Switchgrass  | 33.48 a                 | 47.02 a      | 44.96 a   | 46.93 a  | 48.38 ab  | 47.20 a  |                |       |       |
|                    | Giant reed   | 36.20 a                 | 45.80 a      | 47.30 a   | 51.21 a  | 53.14 b   | 48.92 a  |                |       |       |

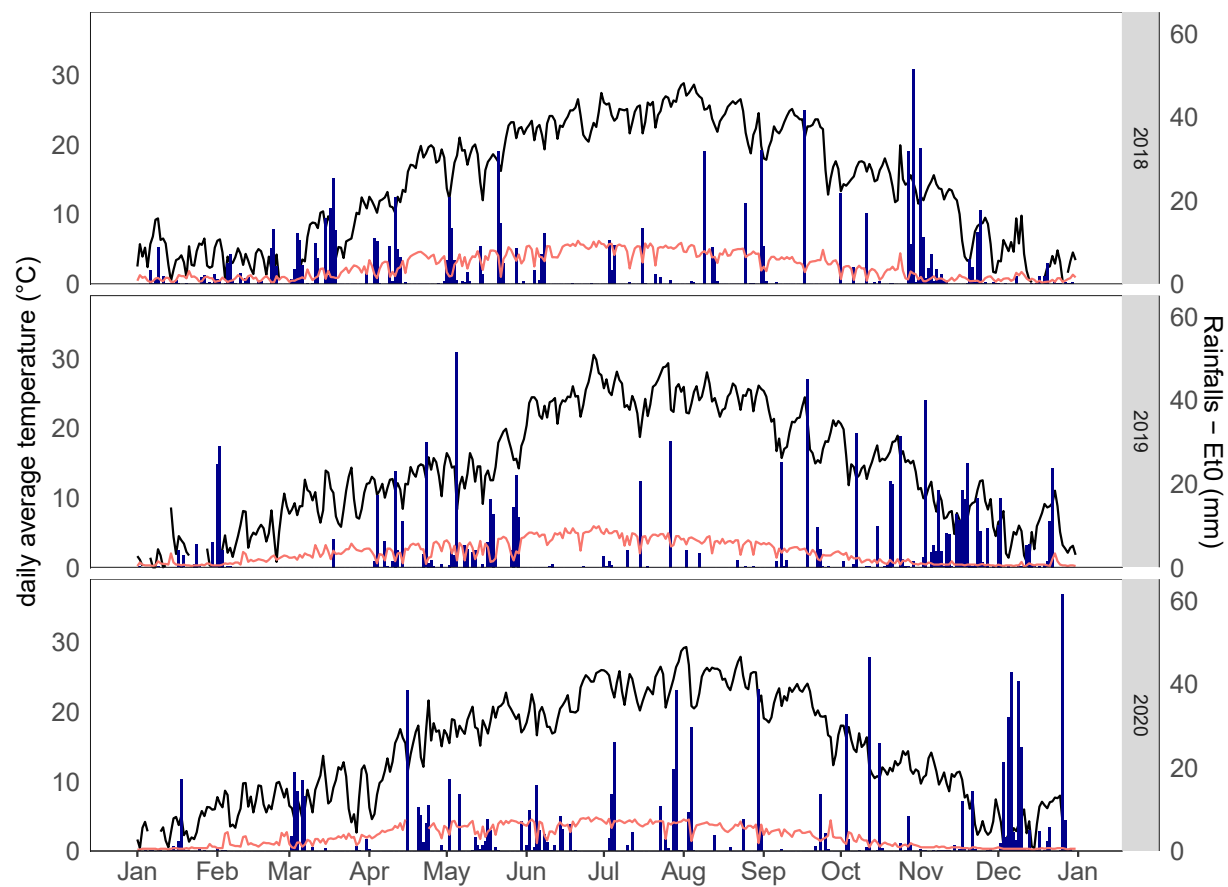

**Figure S1:** Daily mean temperature (°C, black line), rainfalls (mm, blue bars) and potential evapotranspiration (Et0, mm, red line) in 2018, 2019 and 2020 in the field experiment of Gariga (Piacenza, NW Italy).



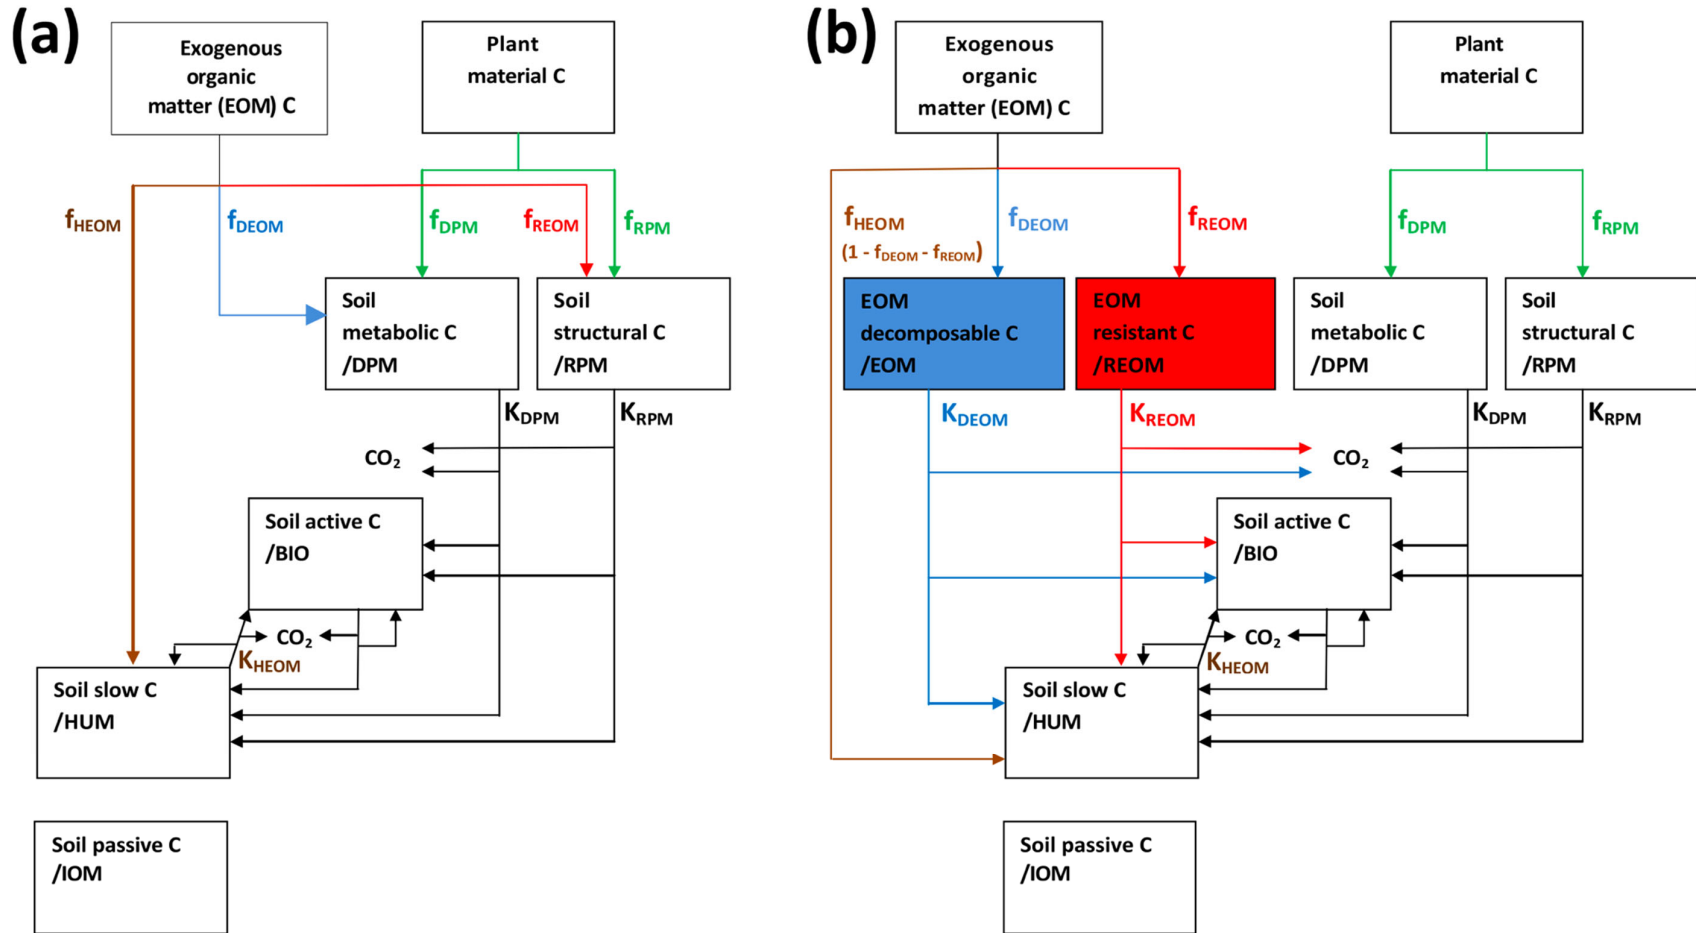

**Figure S2:** Structure of the original (a) and modified (b) version of the Rothamsted Carbon model. The original version (a) is used in ECOSSE, while the modified version (b) used in Ferrarini et al. [22] to derive  $f$  and  $k$  of EOM pool.

**Table S8.** Soil Bulk Density (g cm<sup>-3</sup>) of the 0-30 cm soil layer from the beginning of Gariga experimental trial. Data of the time zero soil characterization (year 2007) were taken from Chimento et al., [47] and Amaducci et al., [3], while data of the 11<sup>th</sup> year of perennial biomass crops cultivation were taken from Martani et al., [17]. Bulk density after the reversion is the average of n=36 samples (2 per plots).

| CROP               |              | Time zero | 11 <sup>th</sup> year | Reversion | Sorghum | Fallow | Soybean | Wheat |
|--------------------|--------------|-----------|-----------------------|-----------|---------|--------|---------|-------|
| Woody<br>PBCs      | Black locust | 1.43      | 1.38                  | 1.09      | 1.10    | 1.30   | 1.28    | 1.33  |
|                    | Poplar       |           | 1.36                  |           |         |        |         |       |
|                    | Willow       |           | 1.36                  |           |         |        |         |       |
| Herbaceous<br>PBCs | Miscanthus   |           | 1.42                  |           |         |        |         |       |
|                    | Switchgrass  |           | 1.43                  |           |         |        |         |       |
|                    | Giant reed   |           | 1.45                  |           |         |        |         |       |

**Table S9.** Input parameters used for the calibration of the ECOSSE model. Arable was common for all the six PBCs, while e for the reversion phase, specific data for each species were used.

| Land use     | Phase     | Year | ECOSSE input parameters                                           |         |              |                                                                     |                         |                                                      |                                                     |                                 |
|--------------|-----------|------|-------------------------------------------------------------------|---------|--------------|---------------------------------------------------------------------|-------------------------|------------------------------------------------------|-----------------------------------------------------|---------------------------------|
|              |           |      | Nitrogen deposition rate (kg N ha <sup>-1</sup> y <sup>-1</sup> ) | Soil pH | Clay content | Total organic C stock in top 50 cm of soil [Mg C ha <sup>-1</sup> ] | Inert organic C content | Soil available water at field capacity [mm/ 0-25 cm] | Soil available water at wilting point [mm/ 0-25 cm] | Depth to impermeable layer (cm) |
| Arable       | PBC       | 2007 |                                                                   |         |              | 45.40                                                               |                         | 99                                                   | 33                                                  |                                 |
| Black locust |           |      |                                                                   |         |              | 52.45                                                               |                         | 109                                                  | 28                                                  |                                 |
| Poplar       |           |      |                                                                   |         |              | 53.22                                                               |                         | 103                                                  | 32                                                  |                                 |
| Willow       | Reversion | 2018 | 20                                                                | 6.9     | 24           | 51.28                                                               | 0.0                     | 102                                                  | 35                                                  | 150                             |
| Miscanthus   |           |      |                                                                   |         |              | 53.70                                                               |                         | 101                                                  | 31                                                  |                                 |
| Switchgrass  |           |      |                                                                   |         |              | 51.35                                                               |                         | 107                                                  | 32                                                  |                                 |
| Giant reed   |           |      |                                                                   |         |              | 54.50                                                               |                         | 104                                                  | 29                                                  |                                 |
| References   |           |      | [90]                                                              | [19]    | [3]          | [17]                                                                |                         |                                                      |                                                     |                                 |
